# Supplementary material for: Hysteresis in the Thermo-Responsive Assembly of Hexa(ethylene glycol) Derivative-Modified Gold Nanodiscs as an Effect of Shape
Source: Nanomaterials (Basel). 2022 Apr 21;12(9):1421. doi: 10.3390/nano12091421 (PMC9102705; doi:10.3390/nano12091421)
Supplement: Supplementary file 1 [file nanomaterials-12-01421-s001.zip › nanomaterials-1681216-supplementary.pdf]

Supplementary Materials

# Hysteresis in the thermo-responsive assembly of hexa(ethylene glycol) derivative-modified gold nanodiscs as an effect of shape

Joshua Chidiebere Mba,<sup>1</sup> Hideyuki Mitomo,<sup>2,\*</sup> Yusuke Yonamine,<sup>2</sup> Guoqing Wang,<sup>3</sup> Yasutaka Matsuo,<sup>2</sup> and Kuniharu Ijiro,<sup>2,\*</sup>

<sup>1</sup> Graduate School of Life Science, Hokkaido University, Kita 10, Nishi 8, Kita-Ku, Sapporo, Hokkaido 060-0810, Japan

<sup>2</sup> Research Institute for Electronic Science, Hokkaido University, Kita 21, Nishi 10, Kita-Ku, Sapporo, Hokkaido 001-0021, Japan

<sup>3</sup> College of Food Science and Engineering, Ocean University of China, 5 Yushan Road, Qingdao 266003, China

\* Correspondence: e-mail: mitomo@es.hokudai.ac.jp (H.M.), ijiro@es.hokudai.ac.jp (K.I.)

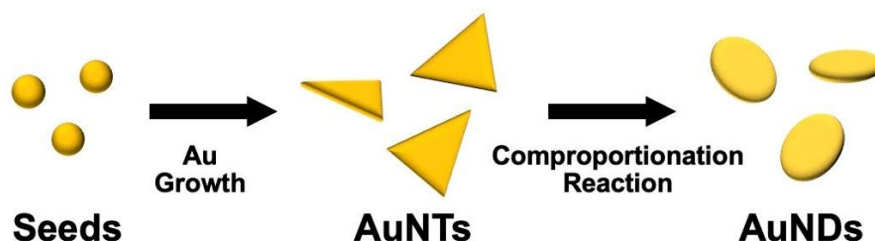

**Scheme 1.** Illustration of AuND synthesis.

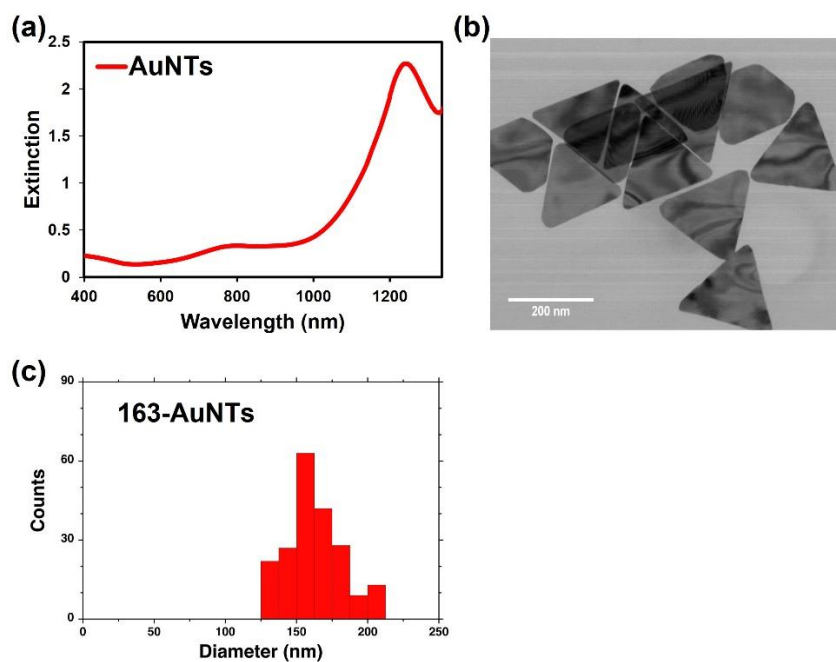

**Figure S1.** Characterization of gold nanotriangles (AuNTs). (a) Extinction spectrum of AuNTs. (b) STEM image of AuNTs. (c) Histogram of AuNT edge length.

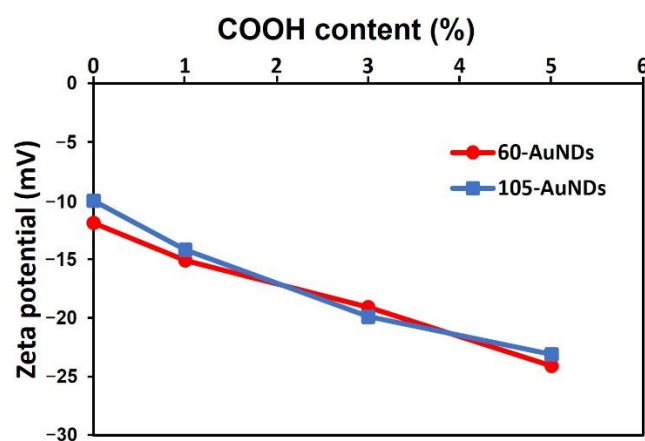

Figure S2. A plot of the zeta potential of AuNDs against the COOH content on their surface ligands.

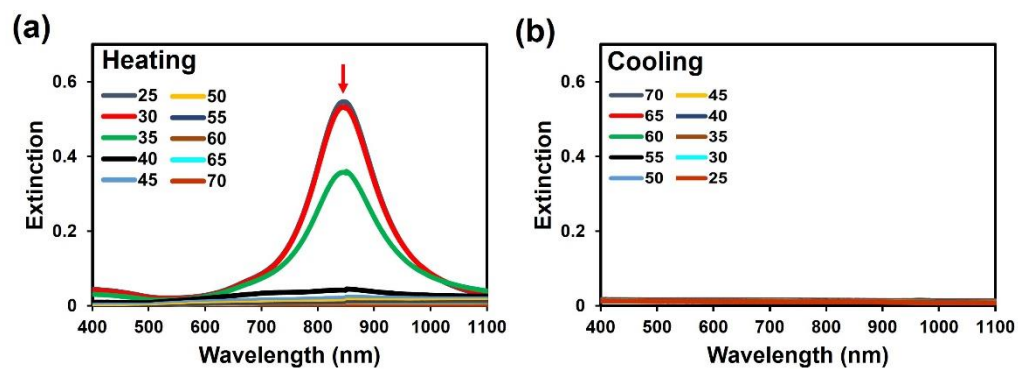

Figure S3. Thermo-responsive assembly of 105-AuND-(100:0). (a) The extinction spectra of 105-AuND-(100:0) upon heating from 25 to 70 °C and (b) upon cooling from 70 to 25 °C.

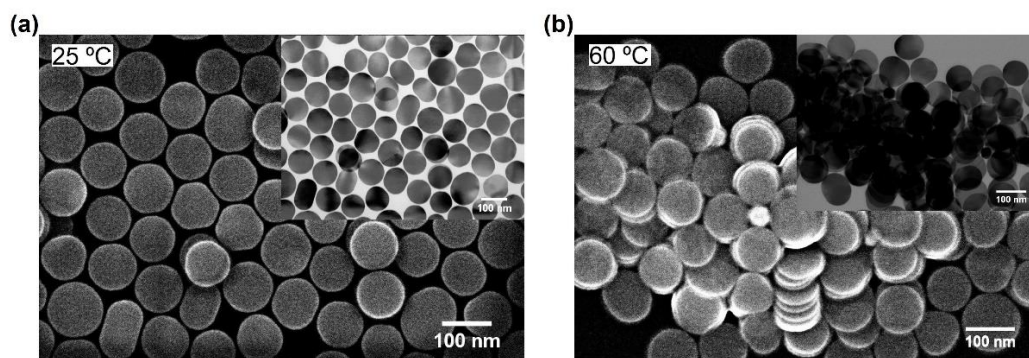

Figure S4. STEM images of 105-AuND-(97:3). (a) SEM image of 105-AuND-(97:3) dried at 25 °C and (b) dried at 60 °C with a STEM image as the insert.

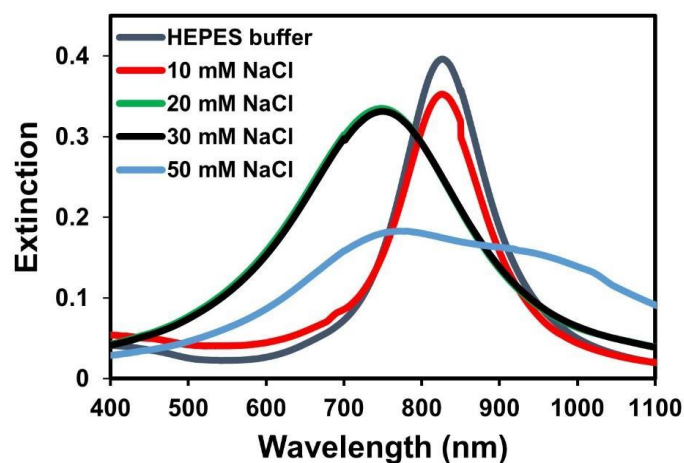

Figure S5. The extinction spectra of 105-AuND-(97:3) under various salt concentrations.

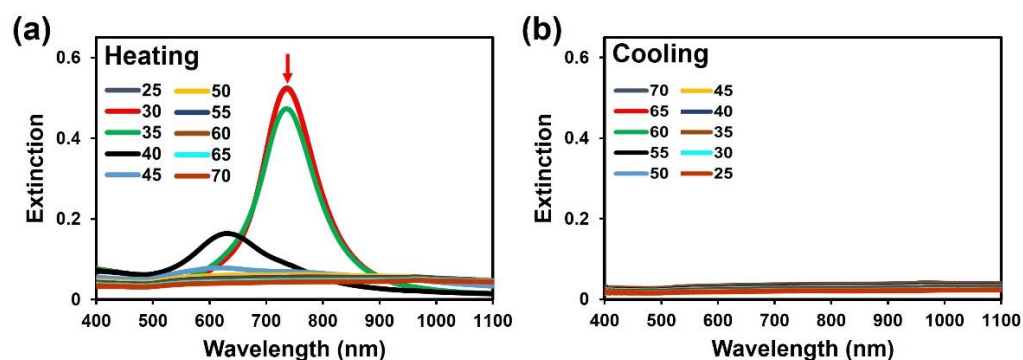

Figure S6. Thermo-responsive assembly of 60-AuND-(100:0). (a) The extinction spectra of 60-AuND-(100:0) upon heating from 25 to 70 °C and (b) upon cooling from 70 to 25 °C.

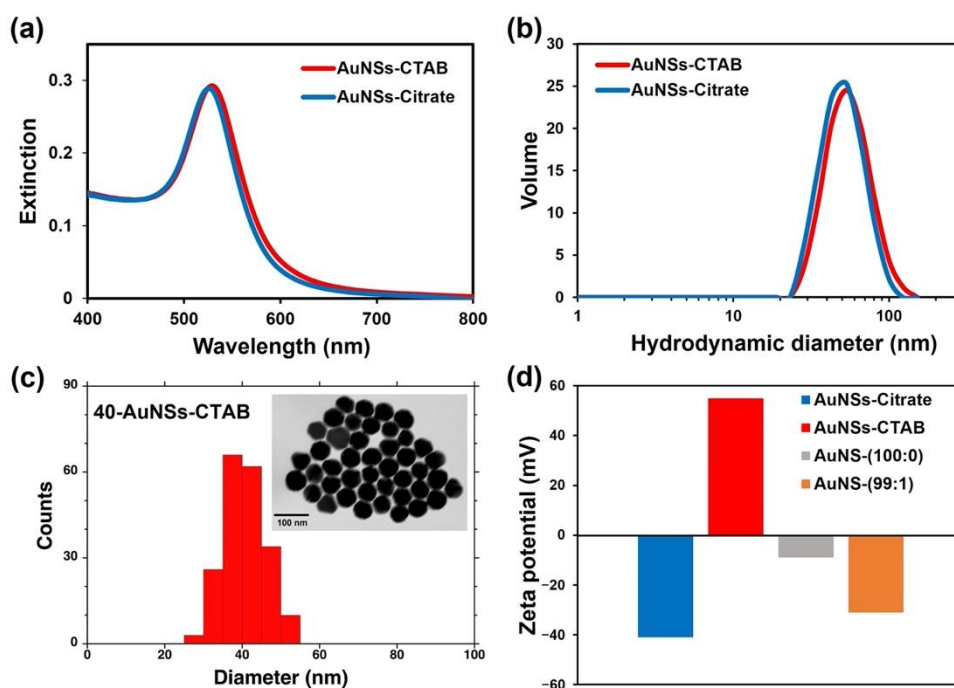

Figure S7. Characterization of 40-AuNSs. (a) The extinction spectra of 40 nm citrate-stabilized AuNSs before (red) and after (blue) CTAB coating. (b) DLS analyses of 40 nm citrate-stabilized

AuNSs before (red) and after (blue) CTAB coating. (c) TEM image and size distribution of 40 nm CTAB-capped AuNSs. (d) Zeta potentials of 40-AuNSs stabilized with citrate (blue), CTAB (red) and modified with a mixture of C1:COOH ligands; (100:00) (grey) and (99:1) (orange).

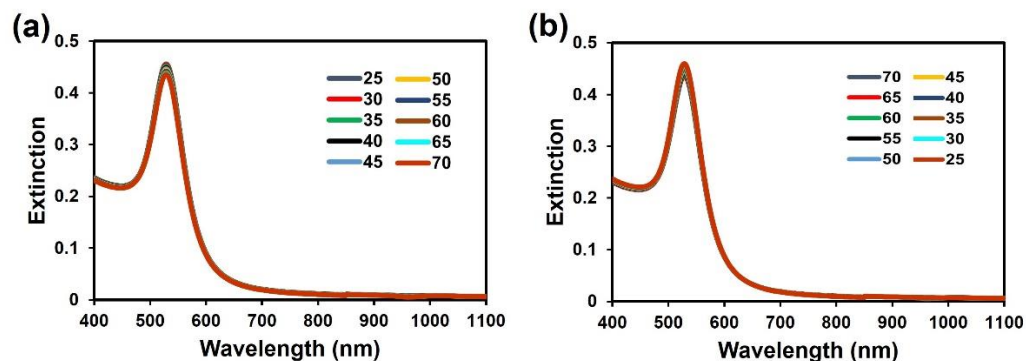

**Figure S8.** Thermo-responsive assembly of 40-AuNS-(99:1). (a) The extinction spectra of 40-AuNS-(99:1) upon heating from 25 to 70 °C and (b) upon cooling from 70 to 25 °C.

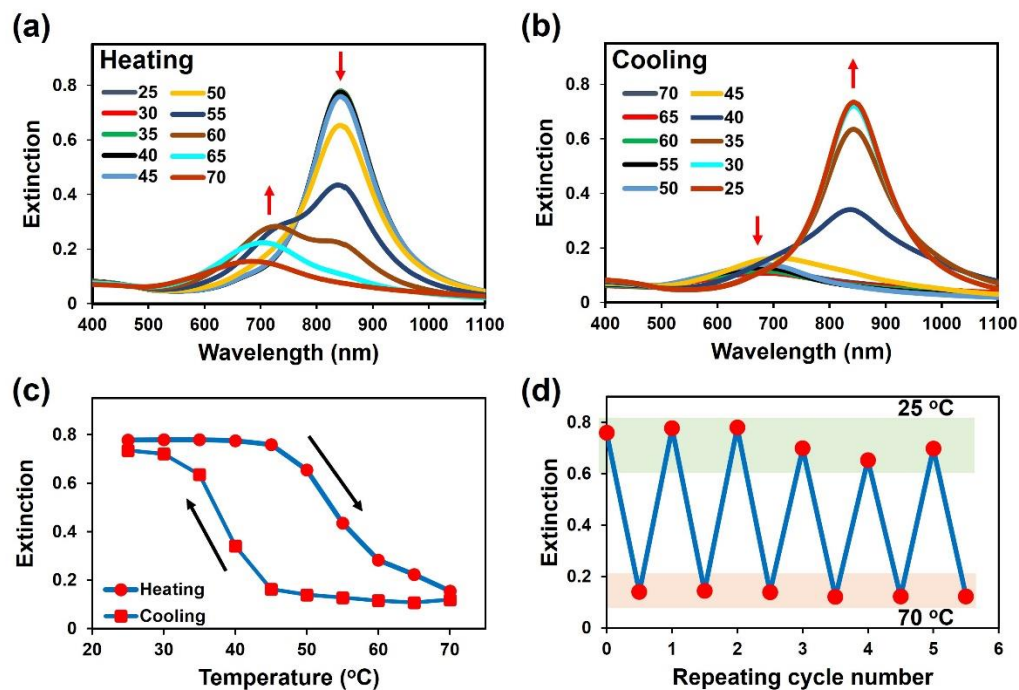

**Figure S9.** Thermo-responsive assembly of 105-AuND-(99:1). (a) The extinction spectra of 105-AuND-(99:1) upon heating from 25 to 70 °C and (b) upon cooling from 70 to 25 °C. (c) The extinction values at 827 nm against temperature changes. (d) The reversible changes in extinction values between 25 and 70 °C.

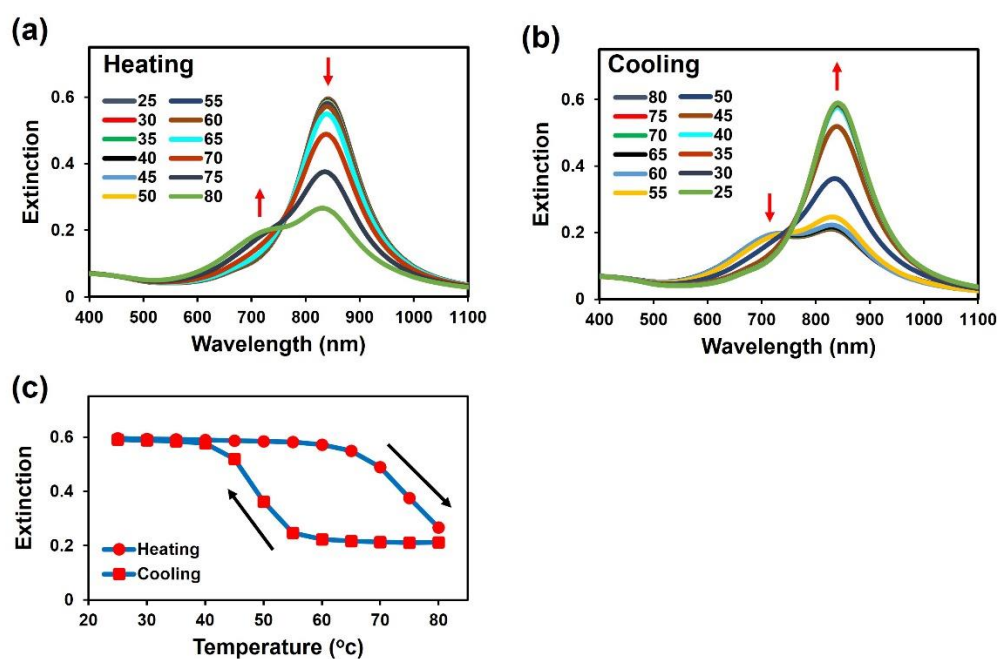

**Figure S10.** Thermo-responsive assembly of 105-AuND-(95:5). (a) The extinction spectra of 105-AuND-(95:5) upon heating from 25 to 80 °C and (b) upon cooling from 80 to 25 °C. (c) The extinction values at 827 nm against temperature changes.

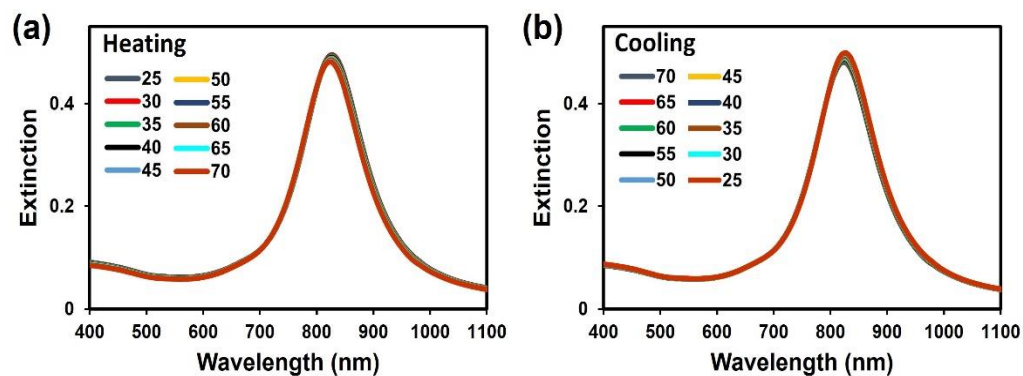

**Figure S11.** Thermo-responsive assembly of 105-AuND-(90:10). (a) The extinction spectra of 105-AuND-(90:10) upon heating from 25 to 70 °C and (b) upon cooling from 70 to 25 °C.

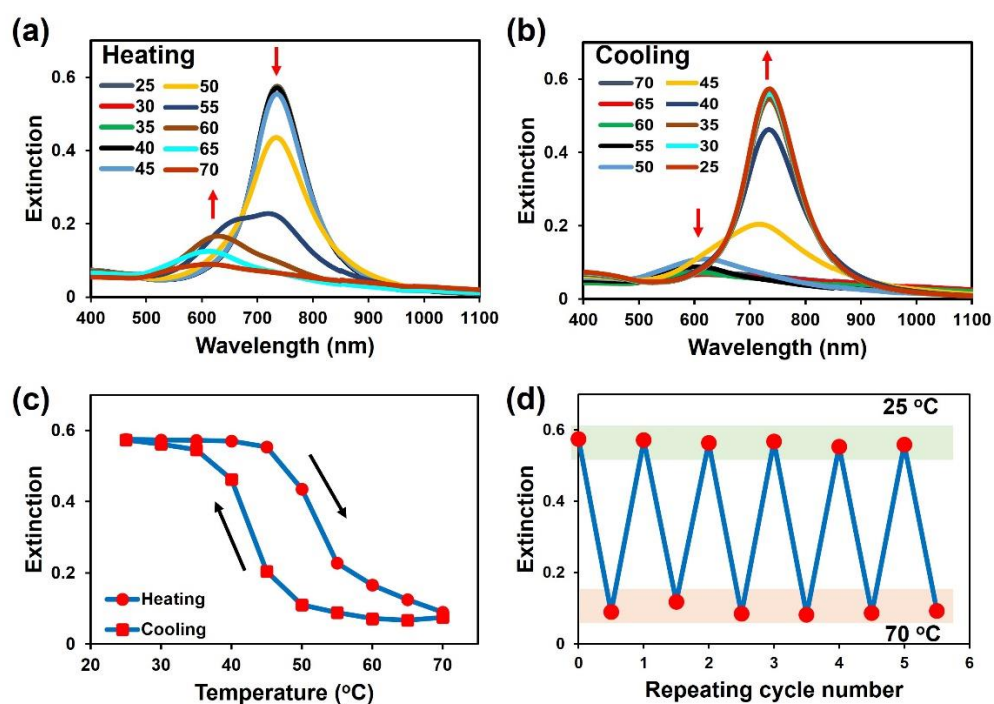

**Figure S12.** Thermo-responsive assembly of 60-AuND-(99:1). (a) The extinction spectra of 60-AuND-(99:1) upon heating from 25 to 70 °C and (b) upon cooling from 70 to 25 °C. (c) The extinction values at 715 nm against temperature changes. (d) The reversible changes in extinction values between 25 and 70 °C.

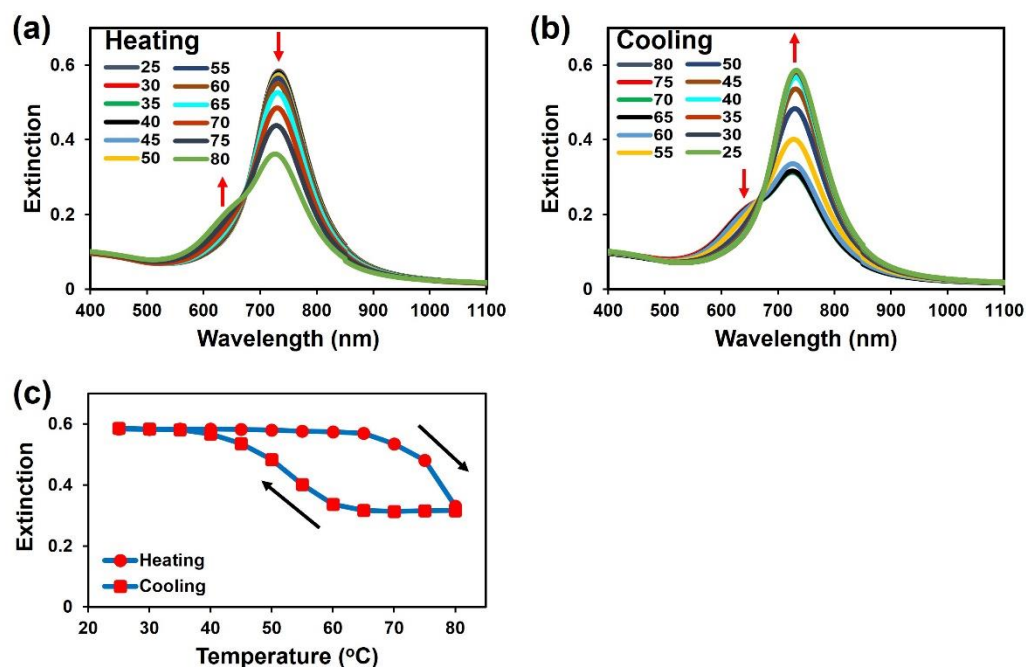

**Figure S13.** Thermo-responsive assembly of 60-AuND-(95:5). (a) The extinction spectra of 60-AuND-(95:5) upon heating from 25 to 80 °C and (b) upon cooling from 80 to 25 °C. (c) The extinction values at 715 nm against temperature changes.

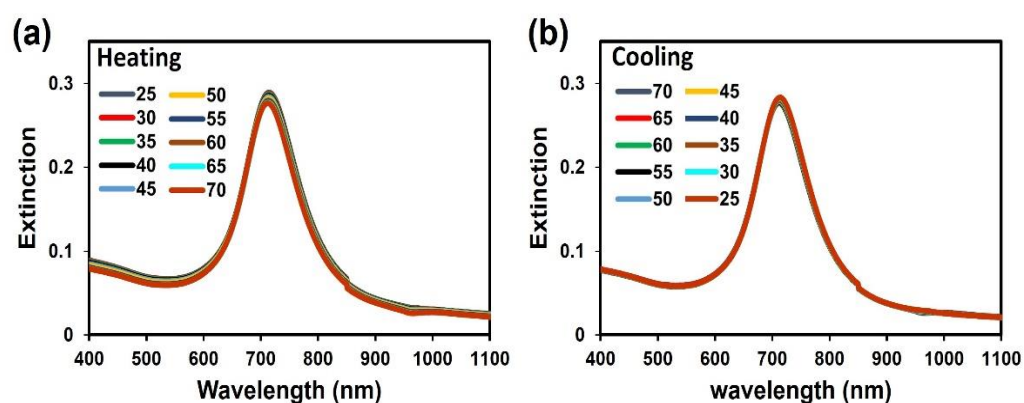

**Figure S14.** Thermo-responsive assembly of 60-AuND-(90:10). (a) The extinction spectra of 60-AuND-(90:10) upon heating from 25 to 70 °C and (b) upon cooling from 70 to 25 °C.

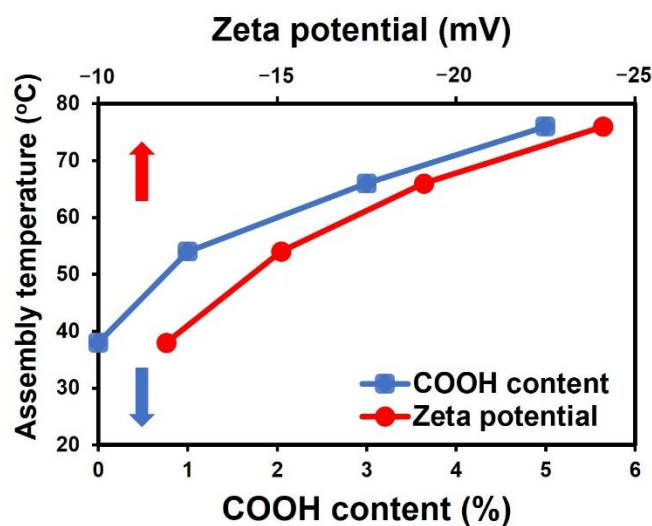

**Figure S15.** Assembly temperature of 60-AuNDs against COOH content and zeta potential.

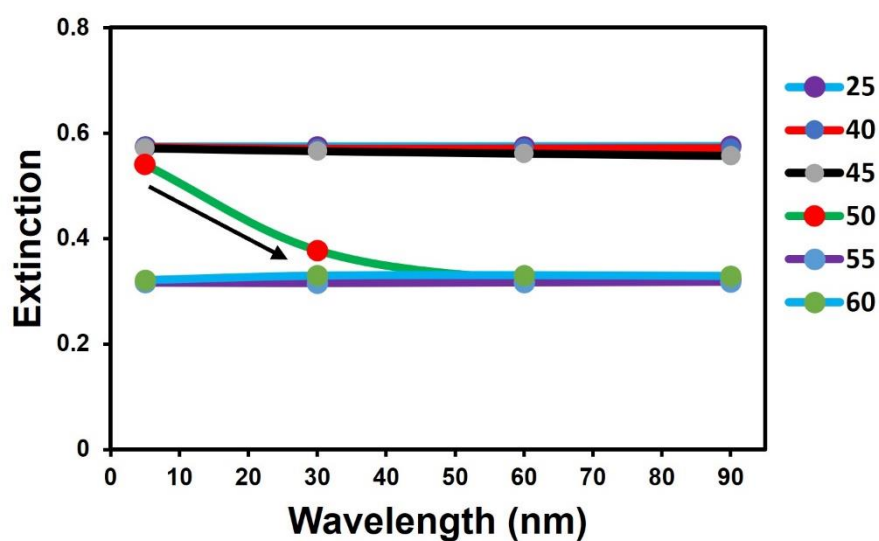

**Figure S16.** The plot of changes in extinction during the time course experiment of 60-AuND-(97:3) at 25, 40, 45, 50, 55 and 60 °C. The starting point was 25 °C and the sample was heated up to 90 min.

This was followed by heating at 40, 45, 50, 55 and 60 °C up to 90 min while measuring the spectrum change every 30 min.

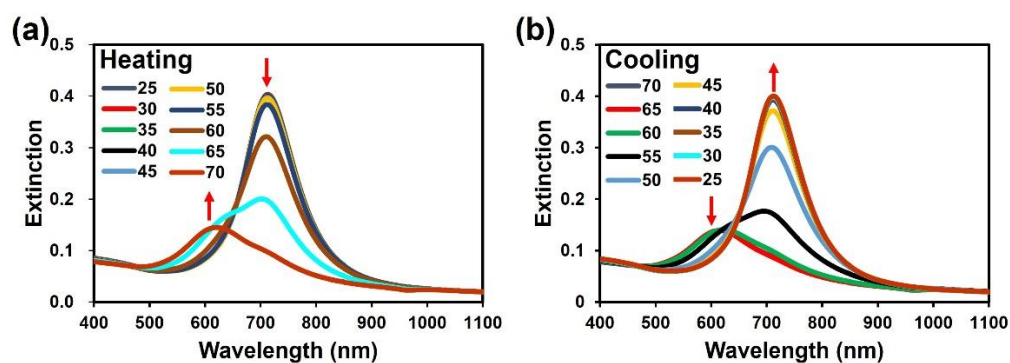

**Figure S17.** Thermo-responsive assembly of 60-AuND-(97:3) with 30 min of waiting time. (a) The extinction spectra of 60-AuND-(97:3) upon heating from 25 to 70 °C and (b) upon cooling from 70 to 25 °C.

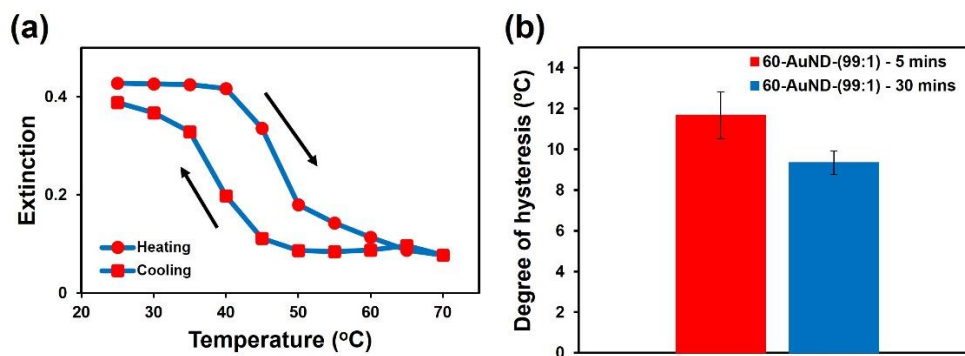

**Figure S18.** (a) The extinction values at 715 nm against temperature changes with 30 min waiting time for 60-AuND-(99:1). (b) A plot of the degree of hysteresis with the 5 and 30 min waiting time for 60-AuND-(99:1). The error bars represent standard deviation of the mean (n = 3).
